# Supplementary material for: Viability and Composition Validation of Commercial Probiotic Products by Selective Culturing Combined with Next-Generation Sequencing
Source: Microorganisms. 2019 Jun 29;7(7):188. doi: 10.3390/microorganisms7070188 (PMC6680966; doi:10.3390/microorganisms7070188)
Supplement: Supplementary file 1 [file microorganisms-07-00188-s001.xlsx]

## Sheet: Sheet1
Probiotics	Identified bacterial species/strain	Forward Primer	Reverse Primer	PCR PRODUCT SIZE
PB2	Lactobacillus casei W56	CTGAACCGCTTGACTGATCG	CAGGCGGGAAAGACATGATG	170
	Lactobacillus rhamnosus LOCK908	CGAGATCTCCAAGTTGCAGC	TACCATGGCTTCGACGCTAT	262
	Lactobacillus plantarum strain B21	CGCCCGTTGATGTAATCGTT	ACTACGGGAGCATGGTCAAA	223
	Lactobacillus acidophilus strain FSI4	ACGCGGAGTTGTATCAGGAA	CCATGAAGTTCTGACGCTGG	253
PB4	Lactobacillus plantarum strain ZS2058	CAACTCGGATTAAGCTGGGC	AACCAACCGTGTGAGCATTC	234
	Lactobacillus rhamnosus ATCC 53103	GTTATGGTTGCAGGCTAGGC	GATTGCTGGCGGTATGAAGG	214
	Bifidobacterium bifidum ATCC 29521	CCCAAAACCGCATGATTCCA	GCTCGGCCATTATTTCGGTT	205
	Lactobacillus acidophilus strain FSI4	GTCTGGGTGCTGTATCTGGT	TTGCATTTGTTCTGGCGTGT	212
	Bifidobacterium animalis strain A6	CACGTCTCATCTTGTCAGCG	CGATCAACTGCATTCTCGGG	201
	Bifidobacterium longum subsp infantis ATCC 15697	ATTCCTCATCGTCAAAGCGC	CAATACGCCGTTGACTTCGT	172
PB5	Lactobacillus casei W56	GATGTCGCCGCCATAACATT	AGTACCATCGTGCACAAGGA	189
	Lactobacillus plantarum strain ZS2058	TAAACTACCCGACCAACCCC	GATGAATCCCAGTCGCCAAC	230
PB6	Lactobacillus rhamnosus LOCK908	CGGTTCCGATCCATTTGCAT	CGGACGAATCGCCTGAAAAT	236
	Bifidobacterium animalis strain A6	TTCGACCCCTGTTCGATCAA	TCAAGGCGCAATATGTCTGC	235
PB7	Lactobacillus casei BL23	CTACACGCCACTAAGCAACC	GGTGTCTTCCTGTTGCTGTG	182
	Lactobacillus acidophilus La-14	CCAGGTGAAGATCGTGTCCT	CCCTTGACTAGCCCCTTCAA	237
PB8	Lactobacillus paracasei strain L9	GGTTGGATCATTGCGGGTTT	CCACTGATCGTTAGTTGCCG	239
	Lactobacillus rhamnosus LOCK900	CAGTGCCGTTTGTCCATTCA	TGGAAGAAGTACGGGGCAAT	193
	Lactobacillus plantarum subsp. plantarum ST-III	TATCAGCGGTCTTCCCCATC	ACGGGACCAGTTGCTTCTAA	200
	Lactobacillus helveticus R0052	GTCGTGACTTTAAGTGGGGC	GCCTTCACGTTCTGATCCAC	215
	Lactobacillus fermentum 3872	ACCAAGATCCTGATTGCCCA	CGTCAAGCTTAAACTCGCGA	215
PB9	Lactobacillus rhamnosus ATCC 53103	CACCACTGGCATTCATCGAG	GGCCAACTTATCGCGACATT	205
	Lactobacillus plantarum strain LZ95	AGCAATGTTTGTAGCACGGG	TATGCCCTGCTGAAACTGGA	197
	Lactobacillus paracasei strain L9	CTGGGGATGAATTGGCGAAG	CATTGCTACTGTTCGCCGAA	230
	Lactobacillus casei subsp. casei ATCC 393	GTTGACGAGACAGCAACCAG	GCCTTGCGTTATGGTCGATT	246
	Lactobacillus fermentum 3872	CCAACACCACCAGTTCCAAG	TCCCGTCTAACCACACTTCC	185
PB10	Lactobacillus plantarum strain B21	CAGCGTCGAGAACCATAACG	ACAGCCCGTTCGTACAAGTA	227
	Bifidobacterium bifidum ATCC 29521	GTGTGCTTGAACTGGCGTAA	GCCGATGAAATGGGTCCTTC	198
	Lactobacillus acidophilus La-14	ATTGGGGTCAGCAGCTTTTG	AGCATTACTTGGGCGGTAGT	251
	Bifidobacterium animalis strain A6	CGTATCGGTGAGCTGTTGTG	AGTGTCACATCGGAACCCAT	228
PB11	Lactobacillus helveticus R0052	CCACACACCACTCCCAAATG	GATGCAGCGCCCATAGAAAA	236
	Bifidobacterium bifidum BGN4	ATCAACATGCTCACCCAGGA	GAGTATGACGCCGATGGAGA	242
	Bifidobacterium longum subsp. infantis ATCC 15697	GGAACGCCAATGAATACCCC	TGTTGGTCAGCAACGTCTTG	268
PB12	Lactobacillus rhamnosus ATCC 53103	AGATTCGAACGCATGAAGGC	TGTAATCCAACACCCGCTCT	255
	Lactobacillus reuteri SD2112	TACCCAAGGATCAAGCCGTT	CAGAGGGAGGCCAAGTTGTA	261
	Lactobacillus acidophilus strain FSI4	GCAAGGTTGAACGAGCTGAA	CAGCGTGGAATTGGATACCG	234
	Lactobacillus salivarius str. Ren	TACAGCGGTAGATCAGTGGC	CGCTCCACAATTGATGGCTT	256
PB13	Bifidobacterium animalis strain A6	GTTCCTCGTTGCAGACCATC	ATGGCCAAGATCACTCACCA	227
PB14	Lactobacillus helveticus R0052	AGGTAGTCGTTTTGCAAGCG	ATACGCCCCATAATGCCTCA	221
	Bifidobacterium longum subsp. infantis 157F	TGGTAAGGAAGCGAACCAGT	TGTTGCGATCGATGAGCTTG	176
PB15	Lactobacillus rhamnosus ATCC 53103	TTGCGTCAGGATAATGCTGC	CAAAGAAGAGATCACCGCGG	216
	Lactobacillus plantarum strain B21	GGTGCTACGACCGAAAATCC	CGGCCAATTCTACCCCATTG	241
PB16	Lactobacillus paracasei strain L9	ACCTACTTCCTCGCGTGAAA	TCACCAACCGTCAGATCGAA	289
	Bifidobacterium longum subsp. longum JCM 1217	CGAATCGTATATGGGCAGCG	CAACTATTCCCTGCACGACG	201
	Lactobacillus acidophilus strain FSI4	TCACTTGACTTGCATGCACC	TTAGCCTTAGGACGACGCTT	221
	Bifidobacterium animalis strain A6	GATGTGATCGTAGGGCTCGA	CACCTCGAATTCCTTGAGCG	240
PB17	Lactobacillus rhamnosus LOCK908	GAAGAACTTGTTCCGCACGT	CGTCAGCTGAAATCTCTGGC	175
	Bifidobacterium longum subsp. longum JCM 1217	GCGGATGAAGTCGAGGTAGA	GCGGATGAAGTCGAGGTAGA	248
	Lactobacillus plantarum subsp. plantarum ST-III	CCGTTACGACCAGCTGATTG	AGTACAGACAACGCTGAGCT	222
	Lactobacillus helveticus DPC 4571	CGTTGCTCAGGTAAGTCAGC	AGGCACCATTATCTAGGGCG	221
	Lactococcus lactis subsp. lactis CV56	CCGTGGTCATCATTAAGCGG	TACTGGTGAGGGTTGGTTCC	233
	Lactobacillus acidophilus strain FSI4	CCGTTTTAGTTTCCGCACCA	CCCGTCAAGTTGCACAAGAA	231
	Lactobacillus casei subsp. casei ATCC 393	GAGCGCGTTATGGCCTTTTA	CGCAGAGTCCCAGCAATAAC	187
	Lactobacillus delbrueckii subsp. bulgaricus ATCC BAA-365	ATGTCCGGCCCTTCATAGAG	AGAATCTTGAAGGACCCGCA	215
	Bifidobacterium breve JCM 7017	GCCCAGCGAATCTATCTCCT	GTCTCCTCCGGGTTCTTTGA	174
	Lactobacillus reuteri JCM 1112	TTTAACGCTTGGTGGTTGGG	GCCAGTTGATGAGTTAGCCG	205
	Streptococcus thermophilus LMD-9	CCAATCTGCACCTCACATGG	GTGCCAGCCTCAAATTTCCA	225
	Bifidobacterium bifidum BGN4	AGTCAGGCCGAAGTCATCAA	GGGAGTCCAGCAAGAGTGAT	242
	Bifidobacterium animalis strain A6	ATGATTCGCTGTTCATCGCC	TCGAGACCATAGCCCATCAC	232
	Lactobacillus brevis KB290	TCATCCGAGCCTGTTATCCC	TGGCTAAACTATGGGTCGCA	224
	Lactobacillus salivarius strain JCM1046	TACTCTAATAGGCGCGGGTG	TGTCACACTAGCAAAGCGTC	169
PB18	Bifidobacterium bifidum S17	CACTCGCATATCCGCAACAA	AGCGGATATAAAGAGGCCCC	204
	Bifidobacterium longum	TACGGTATTGGGGCAGATCC	GGAACAGTATCAGCGCTTGG	221
	Lactobacillus gasseri ATCC 33323	CAGCTGCTGGTTCACTTGTT	TTAAAATTTGGGCGGCGTGA	203
PB19	Lactobacillus rhamnosus LOCK908	ATTGACCCCTGGCTGAATCA	TCCATGATGTGTCCACCGAA	216
	Lactobacillus acidophilus strain FSI4	TTTGTTCATGGCGGTGTCAG	TCTAGTGCATAAGTCGGCGT	209
	Bifidobacterium animalis strain A6	GAGCTTTCGTCATCTGCCAG	CGAAGATCAATGGCATGGCA	254
